# Supplementary material for: The Impact of Footwear on Occupational Task Performance and Musculoskeletal Injury Risk: A Scoping Review to Inform Tactical Footwear
Source: MDPI journal article supplement (doi:10.3390/ijerph191710703), 2022-08-27
Supplement: s1 [file s1]

**SUPPLEMENTARY FILE S1: SEARCH STRATEGIES**

| Database       | Search Terms                                                                                                                                                                                                                                                                                                                                                                                                      |
|----------------|-------------------------------------------------------------------------------------------------------------------------------------------------------------------------------------------------------------------------------------------------------------------------------------------------------------------------------------------------------------------------------------------------------------------|
| PubMed         | "Boot*" [Title/Abstract] OR "Shoe*" [Title/Abstract] OR "Footwear" [Title/Abstract]) AND ("Occupation*" [Title/Abstract] OR "Profession" [Title/Abstract] OR "Trade*" [Title/Abstract] OR "Job" [Title/Abstract] OR "Work*" [Title/Abstract] OR "Safety" [Title/Abstract] OR "Nurses" [Mesh] OR "Miners" [Mesh] OR "Emergency Responders" [Mesh] OR "Military Personnel" [Mesh] OR "Farmers" [Mesh])              |
| SCOPUS         | (Boot*:ti,ab OR Shoe*:ti,ab OR Footwear:ti,ab) AND (Occupation*:ti,ab OR Profession:ti,ab OR Trade*:ti,ab OR Job:ti,ab OR Work*:ti,ab OR Safety:ti,ab OR Nurses/exp OR Miners/exp OR "Emergency Responders"/exp OR "Military Personnel"/exp OR Farmers/exp)                                                                                                                                                       |
| CINAHL         | ((TI Boot* OR AB Boot*) OR (TI Shoe* OR AB Shoe*) OR (TI Footwear OR AB Footwear)) AND ((TI Occupation* OR AB Occupation*) OR (TI Profession OR AB Profession) OR (TI Trade* OR AB Trade*) OR (TI Job OR AB Job) OR (TI Work* OR AB Work*) OR (TI Safety OR AB Safety) OR (MH Nurses+) OR (MH Miners+) OR (MH "Emergency Responders"+) OR (MH "Military Personnel"+) OR (MH Farmers+))                            |
| SportDiscus    | ((TI "Boot*" OR AB "Boot*") OR (TI "Shoe*" OR AB "Shoe*") OR (TI "Footwear" OR AB "Footwear")) AND ((TI "Occupation*" OR AB "Occupation*") OR (TI "Profession" OR AB "Profession") OR (TI "Trade*" OR AB "Trade*") OR (TI "Job" OR AB "Job") OR (TI "Work*" OR AB "Work*") OR (TI "Safety" OR AB "Safety") OR DE "Nurses" OR DE "Miners" OR DE "Emergency Responders" OR DE "Military Personnel" OR DE "Farmers") |
| Embase         | (Boot*:ti,ab OR Shoe*:ti,ab OR Footwear:ti,ab) AND (Occupation*:ti,ab OR Profession:ti,ab OR Trade*:ti,ab OR Job:ti,ab OR Work*:ti,ab OR Safety:ti,ab OR Nurses/exp OR Miners/exp OR "Emergency Responders"/exp OR "Military Personnel"/exp OR Farmers/exp)                                                                                                                                                       |
| Web of Science | (Boot* OR Shoe* OR Footwear) AND (Occupation* OR Profession OR Trade* OR Job OR Work* OR Safety OR Nurses OR Miners OR "Emergency Responders" OR "Military Personnel" OR Farmers)                                                                                                                                                                                                                                 |
